# Supplementary material for: Clean SiO2 atomic layer etching based on physisorption of high boiling point perfluorocarbon
Source: Royal Society of Chemistry journal article supplement (doi:10.1039/d4nr02085e), 2024-01-01
Supplement: d4nr02085e1.pdf [file d4nr02085e1.pdf]

## Supplementary information

### **Clean SiO<sub>2</sub> Atomic Layer Etching based on Physisorption of High Boiling Point-Perfluorocarbon**

Dain Sung,<sup>a</sup> Hyunwoo Tak,<sup>a</sup> Heeju Kim,<sup>a</sup> Dongwoo Kim,<sup>a</sup> Kyongnam Kim <sup>\*b</sup> and Geunyoung Yeom <sup>\*a,c</sup>

<sup>a</sup> *School of Advanced Materials Science and Engineering, Sungkyunkwan University, Suwon 16419, Republic of Korea*

<sup>b</sup> *School of Advanced Materials Engineering, Daejeon University, Daejeon 34520, Republic of Korea*

<sup>c</sup> *SKKU Advanced Institute of Nano Technology (SAINT), Sungkyunkwan University, Suwon 16419, Republic of Korea*

\*Corresponding authors.

E-mail addresses: knam1004@gmail.com (K. N. Kim), gyyeom@skku.edu (G. Y. Yeom)

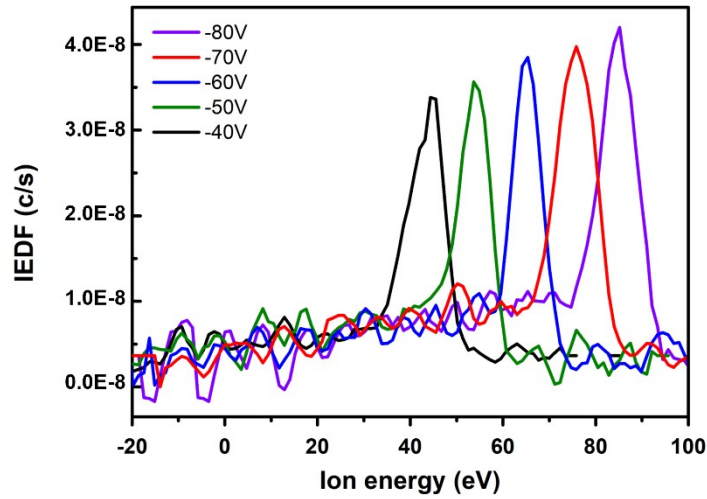

**Fig. S1** IEDFs of Ar<sup>+</sup> ions (input 60 MHz bias voltage of - 40 ~ - 80 V)

Fig. S1 shows the Ar<sup>+</sup> ion energy distribution function (IEDF) at the center of the substrate using an RFEA (retarding field energy analyzer; Impedance, Semion) with the Ar plasma (bias voltage of -40 ~ -80 V). During the measurements, monoenergetic Ar<sup>+</sup> ion distributions were observed because a high bias frequency of 60 MHz was used to minimize the energy split of IEDF for anisotropic etching of SiO<sub>2</sub>. It is believed that the monoenergetic distribution of the Ar<sup>+</sup> ions can control the fluorocarbon layer deposited on the SiO<sub>2</sub> and Si<sub>3</sub>N<sub>4</sub> precisely during the HBP ALE process.

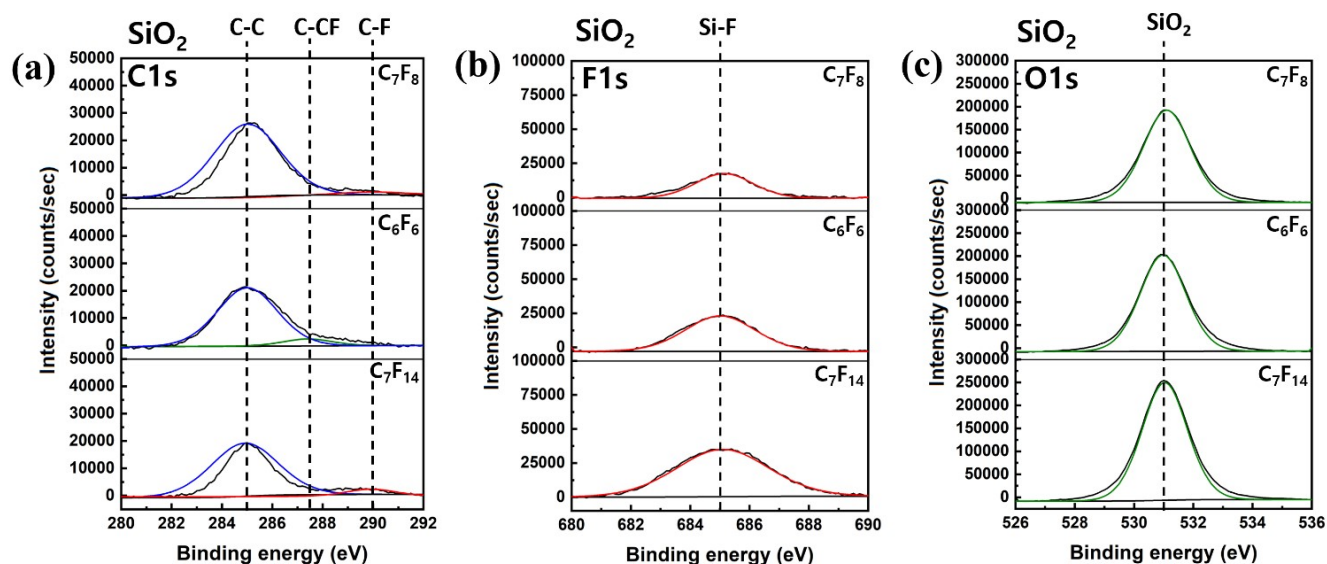

**Fig. S2** (a) C1s, (b) F1s, and (d) O1s XPS narrow scan spectra of SiO<sub>2</sub> surface after ALE process (for 70 cycles) using C<sub>7</sub>F<sub>14</sub>, C<sub>6</sub>F<sub>6</sub>, and C<sub>7</sub>F<sub>8</sub> at the optimized process conditions. The temperature of all substrates was maintained at -15 °C.

The binding states of carbon, fluorine, and oxygen on the surfaces of SiO<sub>2</sub> after the ALE processes investigated using XPS. SiO<sub>2</sub> samples were etched at the following conditions; for C<sub>7</sub>F<sub>14</sub> with the bias voltage of -50 V, for C<sub>6</sub>F<sub>6</sub> with bias voltage of -70 V, and for C<sub>7</sub>F<sub>8</sub> with the bias voltage of -80 V while the adsorption time and the desorption time were maintained at 10 s and 5 s, respectively. Other process conditions are the same as those in Fig. 3. As shown, no significant differences in bonding states on the etched surfaces of SiO<sub>2</sub> were observed for F and O bonding peaks among different PFC gases except for C bonding states.

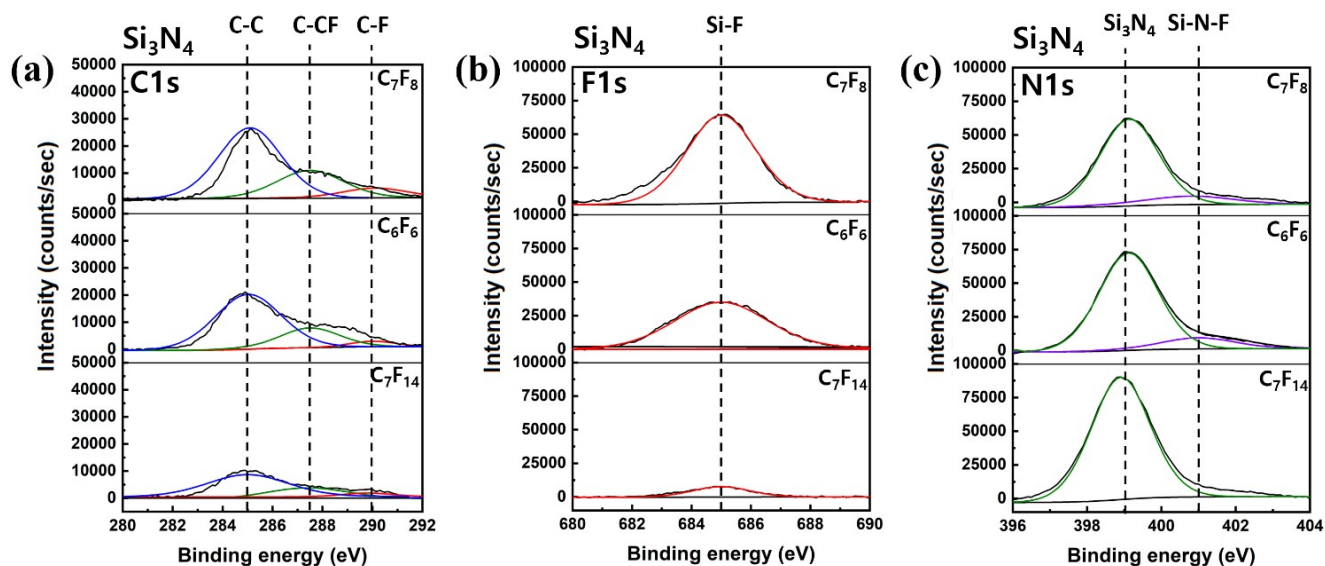

**Fig. S3** (a) C1s, (b) F1s, and (d) N1s XPS narrow scan spectra of Si<sub>3</sub>N<sub>4</sub> surface after ALE process (for 70 cycles) using C<sub>7</sub>F<sub>14</sub>, C<sub>6</sub>F<sub>6</sub>, and C<sub>7</sub>F<sub>8</sub> at the optimized process conditions. The temperature of all substrates was maintained at -15 °C.

The binding states of carbon, fluorine, and nitrogen on the surfaces of Si<sub>3</sub>N<sub>4</sub> after the ALE processes investigated using XPS. Si<sub>3</sub>N<sub>4</sub> samples were etched at the following conditions; for C<sub>7</sub>F<sub>14</sub> with the bias voltage of -50 V, for C<sub>6</sub>F<sub>6</sub> with bias voltage of -70 V, and for C<sub>7</sub>F<sub>8</sub> with the bias voltage of -80 V while the adsorption time and the desorption time were maintained at 10 s and 5 s, respectively. Other process conditions are the same as those in Fig. 3. As shown, no significant differences in bonding states on the etched surfaces of Si<sub>3</sub>N<sub>4</sub> were observed for F and N bonding peaks among different PFC gases except for C bonding states.

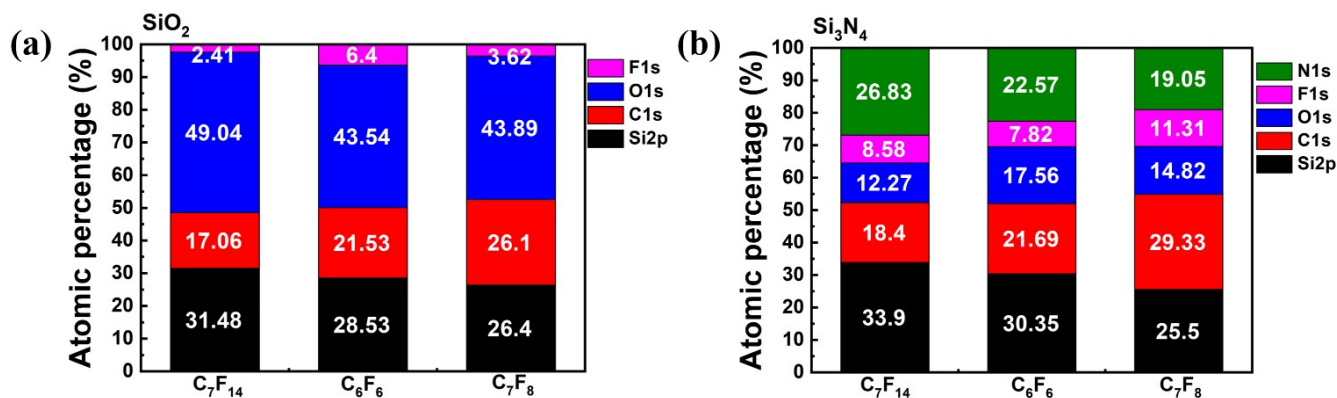

**Fig. S4** Atomic percentages of (a) SiO<sub>2</sub> and (b) Si<sub>3</sub>N<sub>4</sub> surface measured by XPS after C<sub>7</sub>F<sub>14</sub>, C<sub>6</sub>F<sub>6</sub>, and C<sub>7</sub>F<sub>8</sub>-ALE processes (70 cycles) at the optimized process conditions. The temperature of all substrates was maintained at -15 °C.

Atomic percentages of silicon, oxygen, carbon, fluorine, and nitrogen on the surfaces of Si<sub>3</sub>N<sub>4</sub> after the ALE processes investigated using XPS. SiO<sub>2</sub> and Si<sub>3</sub>N<sub>4</sub> samples were etched at the following conditions; for C<sub>7</sub>F<sub>14</sub> with the bias voltage of -50 V, for C<sub>6</sub>F<sub>6</sub> with bias voltage of -70 V, and for C<sub>7</sub>F<sub>8</sub> with the bias voltage of -80 V while the adsorption time and the desorption time were maintained at 10 s and 5 s, respectively. Other process conditions are the same as those in Fig. 3. As shown, the increase of carbon percentage on the etched SiO<sub>2</sub> surface and the increase of carbon and fluorine percentages on the etched Si<sub>3</sub>N<sub>4</sub> surface were observed due to the thicker fluorocarbon layer formation in the sequence of C<sub>7</sub>F<sub>14</sub>, C<sub>6</sub>F<sub>6</sub>, and C<sub>7</sub>F<sub>8</sub>.

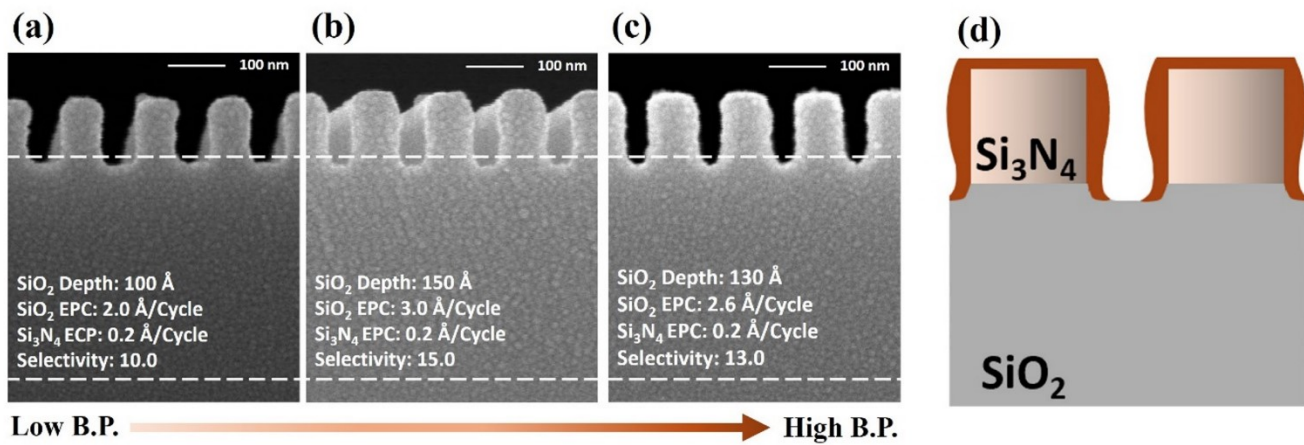

**Fig. S5** SEM cross-sectional images of the Si<sub>3</sub>N<sub>4</sub> masked SiO<sub>2</sub> sample after the ALE processes for (a) C<sub>7</sub>F<sub>14</sub>, (b) C<sub>6</sub>F<sub>6</sub>, and (c) C<sub>7</sub>F<sub>8</sub> with the optimized process conditions in Fig. 4. (d) Schematic drawing showing a polymer formed at the sidewall of Si<sub>3</sub>N<sub>4</sub> mask during the ALE cycles. The number of ALE cycles were 50 cycles. The temperature of all substrates was maintained at -15 °C.

When the ALE processes were performed for 50 cycles using the previously optimized conditions in Fig. 4 using C<sub>7</sub>F<sub>14</sub>, C<sub>6</sub>F<sub>6</sub>, and C<sub>7</sub>F<sub>8</sub>, due to the fluorocarbon deposition not only on the top of the Si<sub>3</sub>N<sub>4</sub> masked SiO<sub>2</sub> but also on the sidewall of the Si<sub>3</sub>N<sub>4</sub> mask, the SiO<sub>2</sub> EPC was decreased to 2.0 Å/cycle for C<sub>7</sub>F<sub>14</sub>, 3.0 Å/cycle for C<sub>6</sub>F<sub>6</sub>, and 2.6 Å/cycle for C<sub>7</sub>F<sub>8</sub>, and Si<sub>3</sub>N<sub>4</sub> mask was thickened due to the deposition of fluorocarbon layer on the sidewall.
